# Supplementary material for: Application of an Interpretable Machine Learning for Estimating Severity of Graves’ Orbitopathy Based on Initial Finding
Source: MDPI journal article supplement (doi:10.3390/jcm12072640), 2023-04-01
Supplement: s1 [file s1]

Supplemental Table S1. **(A)** Demographic for randomly split cohort for SMSGOP (training and validation cohort)

|                                                     | Training cohort<br>( <i>n</i> = 320, 80%) | Validation cohort<br>( <i>n</i> = 80, 20%) | <i>p</i> |
|-----------------------------------------------------|-------------------------------------------|--------------------------------------------|----------|
| Age (years)                                         | 40.2 ± 13.8                               | 37.7 ± 13.9                                | 0.162    |
| Gender                                              |                                           |                                            | 1        |
| Female                                              | 241 (75.3%)                               | 60 (75.0%)                                 |          |
| Male                                                | 79 (24.7%)                                | 20 (25.0%)                                 |          |
| Duration of follow up for GD<br>(months)            | 63.4 ± 47.7                               | 56.5 ± 52.6                                | 0.59     |
| Duration of follow up for GO<br>(months)            | 48.7 ± 42.1                               | 43.7 ± 48.1                                | 0.424    |
| Interval between diagnosis of GD<br>and GO (months) | 18.3 ± 38.4                               | 23.3 ± 52.1                                | 0.425    |
| Hypertension                                        | 34 (10.6%)                                | 7 (8.8%)                                   | 0.773    |
| Diabetes mellitus                                   | 11 (3.4%)                                 | 3 (3.8%)                                   | 1        |
| Cerebrovascular disease                             | 6 (1.9%)                                  | 1 (1.2%)                                   | 1        |
| Autoimmune diseases                                 | 5 (1.6%)                                  | 3 (3.8%)                                   | 0.422    |
| History of taking statin                            | 36 (11.2%)                                | 12 (15.0%)                                 | 0.465    |
| Smoking behavior                                    |                                           |                                            | 0.444    |
| Never smoker                                        | 285 (89.1%)                               | 70 (87.5%)                                 |          |
| Ex-smoker                                           | 14 (4.4%)                                 | 2 (2.5%)                                   |          |
| Current smoker                                      | 21 (6.6%)                                 | 8 (10.0%)                                  |          |
| History of RAI *                                    | 9 (2.8%)                                  | 0 (0.0%)                                   | 0.273    |
| History of thyroidectomy                            | 10 (3.1%)                                 | 3 (3.8%)                                   | 1        |
| ft3                                                 |                                           |                                            | 0.823    |
| Lower                                               | 5 (1.6%)                                  | 2 (2.5%)                                   |          |
| Normal                                              | 193 (60.3%)                               | 49 (61.2%)                                 |          |
| Higher                                              | 122 (38.1%)                               | 29 (36.2%)                                 |          |
| ft4                                                 |                                           |                                            | 0.504    |
| Lower                                               | 44 (13.8%)                                | 9 (11.2%)                                  |          |
| Normal                                              | 141 (44.1%)                               | 41 (51.2%)                                 |          |
| Higher                                              | 135 (42.2%)                               | 30 (37.5%)                                 |          |
| Thyroid Stimulating Hormone<br>(TSH)                |                                           |                                            | 0.76     |
| Lower                                               | 226 (70.6%)                               | 54 (67.5%)                                 |          |
| Normal                                              | 64 (20.0%)                                | 19 (23.8%)                                 |          |
| Higher                                              | 30 (9.4%)                                 | 7 (8.8%)                                   |          |
| TSH-R Ab                                            |                                           |                                            | 0.172    |
| Negative                                            | 59 (18.4%)                                | 9 (11.2%)                                  |          |
| Positive                                            | 261 (81.6%)                               | 71 (88.8%)                                 |          |
| Thyroglobulin antibody (TG Ab)                      |                                           |                                            | 0.858    |
| Negative                                            | 194 (60.6%)                               | 47 (58.8%)                                 |          |
| Positive                                            | 126 (39.4%)                               | 33 (41.2%)                                 |          |
| Thyroid peroxidase antibody<br>(TPO Ab)             |                                           |                                            | 0.772    |
| Negative                                            | 112 (35.0%)                               | 26 (32.5%)                                 |          |
| Positive                                            | 208 (65.0%)                               | 54 (67.5%)                                 |          |
| Thyroid stimulating<br>immunoglobulin (TSI)         |                                           |                                            | 0.435    |
| Negative                                            | 67 (20.9%)                                | 13 (16.2%)                                 |          |

|                                                               |               |                |       |
|---------------------------------------------------------------|---------------|----------------|-------|
| Positive                                                      | 253 (79.1%)   | 67 (83.8%)     |       |
| CAS                                                           | 1.7 ± 1.4     | 2.0 ± 1.4      | 0.158 |
| NOSPECS                                                       | 2.3 ± 1.6     | 2.4 ± 1.5      | 0.673 |
| Proptosis                                                     |               |                | 0.612 |
| <15 mm                                                        | 111(34.7%)    | 27(33.8%)      |       |
| 15–18 mm                                                      | 122 (38.1%)   | 25 (31.2%)     |       |
| >18 mm                                                        | 87 (27.2%)    | 28 (35.0%)     |       |
| Type of eye deviation                                         |               |                | 0.784 |
| Normal                                                        | 226 (70.6%)   | 60 (75.0%)     |       |
| Horizontal                                                    | 61 (19.1%)    | 13 (16.2%)     |       |
| Vertical                                                      | 24 (7.5%)     | 6 (7.5%)       |       |
| Mixed                                                         | 9 (2.8%)      | 1 (1.2%)       |       |
| Amount of eye deviation (°)                                   | 5.5 ± 11.6    | 4.2 ± 9.4      | 0.306 |
| Central diplopia †                                            |               |                | 0.549 |
| Absence                                                       | 275 (85.9%)   | 66 (82.5%)     |       |
| Presence                                                      | 45 (14.1%)    | 14 (17.5%)     |       |
| The Ratio of the Cross-Sectional area to total Orbit (RCSO) † |               |                |       |
| Orbital fat                                                   | 0.717 ± 0.082 | 0.0708 ± 0.085 | 0.409 |
| Superior rectus muscle                                        | 0.058 ± 0.020 | 0.060 ± 0.018  | 0.329 |
| Medial rectus muscle                                          | 0.048 ± 0.015 | 0.051 ± 0.017  | 0.222 |
| Inferior rectus muscle                                        | 0.059 ± 0.024 | 0.062 ± 0.024  | 0.293 |
| Lateral rectus muscle                                         | 0.060 ± 0.023 | 0.060 ± 0.024  | 0.852 |
| Total extraocular muscle ††                                   | 0.225 ± 0.082 | 0.233 ± 0.083  | 0.256 |

\* RAI, radioactive iodine therapy.

† Diplopia within ≤30° of field of view measured by Binocular single vision test.

† Ratio of the Cross-Sectional area to total Orbit (RCSO), cross sectional area measurement taken at the 4 mm behind the eyeball using computed tomography (CT).

†† Total extraocular muscle = superior rectus muscle + medial rectus muscle + inferior rectus muscle + lateral rectus muscle.

## (B) Demographic for randomly split cohort for SMGOP (training and validation cohort)

|                                                     | Training cohort<br>(n = 144) | Validation cohort<br>(n = 35) | p     |
|-----------------------------------------------------|------------------------------|-------------------------------|-------|
| Age (years)                                         | 42.6 ± 13.6                  | 44.1 ± 15.2                   | 0.584 |
| Gender                                              |                              |                               | 0.706 |
| Female                                              | 104 (72.2%)                  | 27 (77.1%)                    |       |
| Male                                                | 40 (27.8%)                   | 8 (22.9%)                     |       |
| Duration of follow up for GD<br>(months)            | 61.4 ± 39.7                  | 59.5 ± 43.2                   | 0.47  |
| Duration of follow up for GO<br>(months)            | 49.2 ± 38.1                  | 44.2 ± 50.1                   | 0.398 |
| Interval between diagnosis of GD<br>and GO (months) | 20.7 ± 45.3                  | 30.6 ± 49.6                   | 0.256 |
| Hypertension                                        | 20 (13.9%)                   | 5 (14.3%)                     | 1     |
| Diabetes mellitus                                   | 3 (2.1%)                     | 1 (2.9%)                      | 1     |
| Cerebrovascular disease                             | 2 (1.4%)                     | 1 (2.9%)                      | 1     |
| Autoimmune diseases                                 | 3 (2.1%)                     | 0 (0.0%)                      | 0.899 |
| History of taking statin                            | 18 (12.5%)                   | 9 (25.7%)                     | 0.09  |
| Smoking behavior                                    |                              |                               | 0.268 |
| Never smoker                                        | 121 (84.0%)                  | 30 (85.7%)                    |       |
| Ex-smoker                                           | 9 (6.2%)                     | 4 (11.4%)                     |       |

|                                                               |                |                |       |
|---------------------------------------------------------------|----------------|----------------|-------|
| Current smoker                                                | 14 (9.7%)      | 1 (2.9%)       |       |
| History of RAI *                                              | 3 (2.1%)       | 2 (5.7%)       | 0.55  |
| History of thyroidectomy                                      | 7 (4.9%)       | 2 (5.7%)       | 1     |
| ft3                                                           |                |                | 0.516 |
| Lower                                                         | 5 (3.5%)       | 0 (0.0%)       |       |
| Normal                                                        | 92 (63.9%)     | 24 (68.6%)     |       |
| Higher                                                        | 47 (32.6%)     | 11 (31.4%)     |       |
| ft4                                                           |                |                | 0.605 |
| Lower                                                         | 22 (15.3%)     | 4 (11.4%)      |       |
| Normal                                                        | 73 (50.7%)     | 21 (60.0%)     |       |
| Higher                                                        | 49 (34.0%)     | 10 (28.6%)     |       |
| Thyroid Stimulating Hormone (TSH)                             |                |                | 0.296 |
| Lower                                                         | 97 (67.4%)     | 19 (54.3%)     |       |
| Normal                                                        | 32 (22.2%)     | 12 (34.3%)     |       |
| Higher                                                        | 15 (10.4%)     | 4 (11.4%)      |       |
| TSH-R Ab                                                      |                |                | 0.171 |
| Negative                                                      | 24 (16.7%)     | 10 (28.6%)     |       |
| Positive                                                      | 120 (83.3%)    | 25 (71.4%)     |       |
| Thyroglobulin antibody (TG Ab)                                |                |                | 0.049 |
| Negative                                                      | 87 (60.4%)     | 28 (80.0%)     |       |
| Positive                                                      | 57 (39.6%)     | 7 (20.0%)      |       |
| Thyroid peroxidase antibody (TPO Ab)                          |                |                | 0.186 |
| Negative                                                      | 50 (34.7%)     | 17 (48.6%)     |       |
| Positive                                                      | 94 (65.3%)     | 18 (51.4%)     |       |
| Thyroid stimulating immunoglobulin (TSI)                      |                |                | 0.645 |
| Negative                                                      | 19 (13.2%)     | 3 (8.6%)       |       |
| Positive                                                      | 125 (86.8%)    | 32 (91.4%)     |       |
| CAS                                                           | 2.7 ± 1.3      | 1.9 ± 1.3      | 0.003 |
| NOSPECS                                                       | 3.3 ± 1.5      | 2.7 ± 1.2      | 0.035 |
| Proptosis                                                     |                |                | 0.598 |
| <15 mm                                                        | 50 (34.7%)     | 12 (34.3%)     |       |
| 15–18 mm                                                      | 48 (33.3%)     | 12 (34.3%)     |       |
| >18 mm                                                        | 46 (31.9%)     | 11 (32.4%)     |       |
| Type of eye deviation                                         |                |                | 0.347 |
| Normal                                                        | 90 (62.5%)     | 21 (60.0%)     |       |
| Horizontal                                                    | 29 (20.1%)     | 4 (11.4%)      |       |
| Vertical                                                      | 18 (12.5%)     | 8 (22.9%)      |       |
| Mixed                                                         | 7 (4.9%)       | 2 (5.7%)       |       |
| Amount of eye deviation (°)                                   | 8.2 ± 14.9     | 8.4 ± 12.4     | 0.963 |
| Central diplopia †                                            |                |                | 0.209 |
| Absence                                                       | 97 (67.4%)     | 28 (80.0%)     |       |
| Presence                                                      | 47 (32.6%)     | 7 (20.0%)      |       |
| The Ratio of the Cross-Sectional area to total Orbit (RCSO) † |                |                |       |
| Orbital fat                                                   | 0.0710 ± 0.082 | 0.0714 ± 0.074 | 0.8   |
| Superior rectus muscle                                        | 0.060 ± 0.019  | 0.059 ± 0.016  | 0.671 |
| Medial rectus muscle                                          | 0.050 ± 0.016  | 0.050 ± 0.016  | 0.846 |
| Inferior rectus muscle                                        | 0.063 ± 0.023  | 0.062 ± 0.020  | 0.82  |
| Lateral rectus muscle                                         | 0.060 ± 0.023  | 0.059 ± 0.022  | 0.922 |
| Total extraocular muscle ††                                   | 0.233 ± 0.081  | 0.230 ± 0.074  | 0.256 |

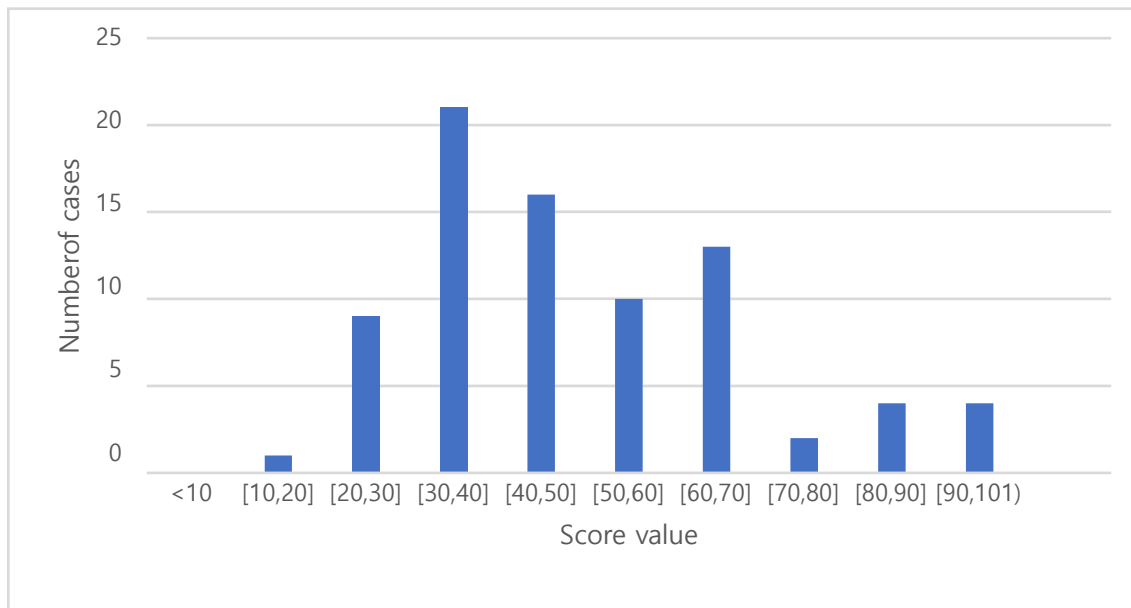

(A)

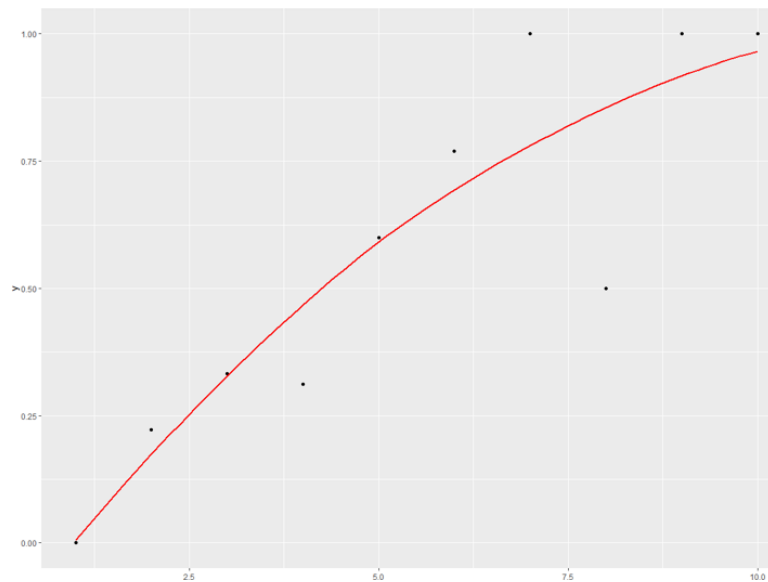

(B)

Supplemental Figure S1. (A) Number of Cases Versus Score Value on the Testing Cohort for SMSGOP (B) Observed Severity Rate Versus Score Value on the Testing Cohort for SMSGOP

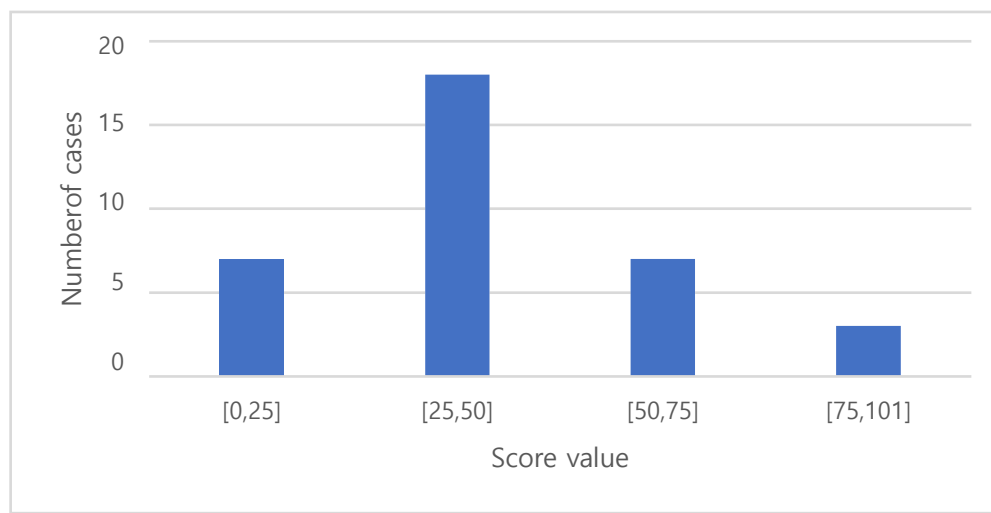

(A)

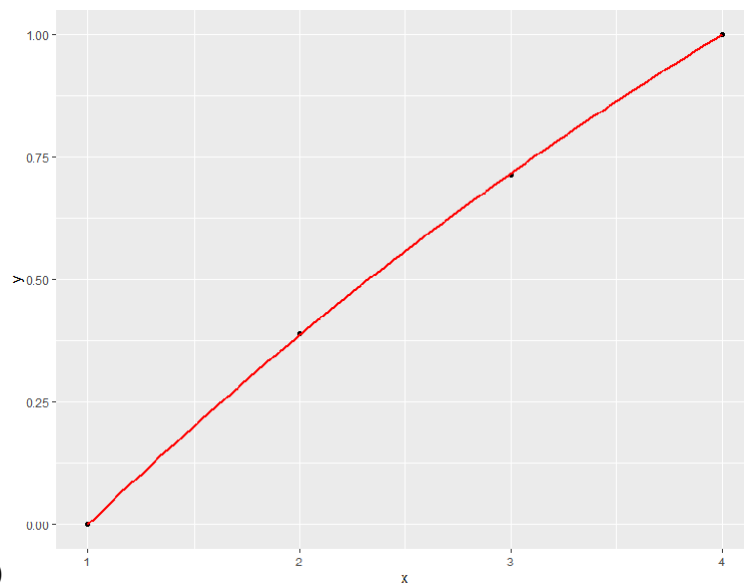

(B)

Supplemental Figure S2. (A) Number of Cases Versus Score Value on the Testing Cohort for SMGOP (B) Observed Severity Rate Versus Score Value on the Testing Cohort for SMGOP
